# Supplementary material for: Oxidative Stress and Lung Fibrosis: Towards an Adverse Outcome Pathway
Source: MDPI journal article supplement (doi:10.3390/ijms241512490), 2023-08-06
Supplement: s1 [file s1]

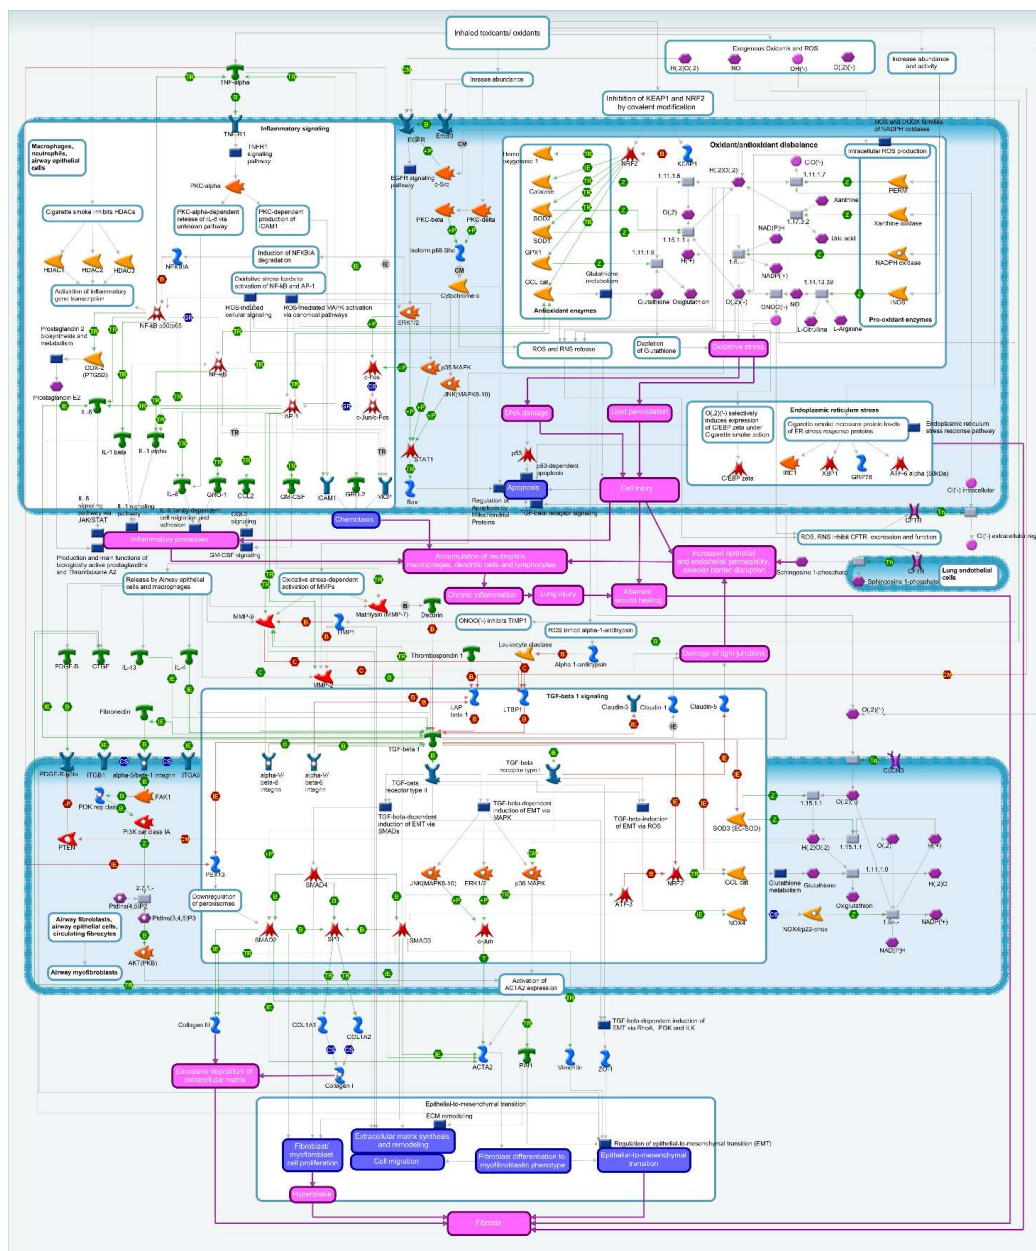

**Supplemental Figure S1.** Mechanisms that contribute to lung fibrosis. Lung fibrosis is characterized by injury and loss of lung epithelial cells, inflammation, abnormal wound healing, accumulation of fibroblasts/myofibroblasts and aberrant remodeling of the lung parenchyma. Certain conditions, such as chronic cigarette smoking and exposure to different toxicants, induce oxidant/antioxidant disbalance, suppression of anti-oxidant enzymes and increased generation of endogenous ROS and RNS leading to oxidative stress. ROS and RNS activate intracellular signaling pathways leading to DNA damage, cell injury, apoptosis and activation of transcription factors, such as NF- $\kappa$ B and AP-1 in airway epithelial cells and macrophages. NF- $\kappa$ B and AP-1 stimulate expression of inflammatory genes, promoting accumulation of neutrophils, macrophages, dendritic cells and lymphocytes. Chronic lung inflammation leads to unresolved lung injury. The recurrent injury leads to permanent fibrosis, through a process that is considered to represent a form of abnormal wound healing. Activated macrophages release pro-fibrotic factors such as TGF *beta*-1, IL-4, IL-13 and others, which promote additional ROS generation, EMT, ECM synthesis and remodeling and fibroblast-to-myofibroblast differentiation driving the progression to lung fibrosis. The Supplementary Figure S1 was generated using MetaCore Pathway Map Creator tool Version 2.6.0 (Clarivate Analytics, Philadelphia PA).

**Supplemental Table S1.** Key word combinations used in the literature search to develop the AOP for lung fibrosis.

|                                                     |                                              |                             |                                  |
|-----------------------------------------------------|----------------------------------------------|-----------------------------|----------------------------------|
| oxidative stress                                    | lung fibrosis                                | cigarette smoking           | environmental toxins             |
| oxidative damage                                    | pulmonary fibrosis                           | tobacco smoking             | environmental pollutants         |
| redox imbalance                                     | fibrotic lung disease                        | smoking habit               | toxic environmental agents       |
| reactive oxygen/nitrogen species (ROS/RNS) toxicity | interstitial lung fibrosis                   | inhalation of tobacco smoke | harmful environmental substances |
| free radicals                                       | pulmonary scarring                           | cigarette consumption       | pollutants in the environment    |
| oxygen radicals                                     | lung tissue fibrosis                         | nicotine exposure           | chemical environmental hazards   |
| oxidative burden                                    | pulmonary fibrogenesis                       | tobacco use                 | asbestos fibers                  |
| oxidative injury                                    | inflammation                                 |                             | silica particles                 |
| glutathione                                         | inflammatory response                        |                             | carbon nanotubes (CNT)           |
| antioxidant/oxidant disbalance                      | fibrotic response                            |                             | radiation                        |
| superoxide radical                                  | IPD (Idiopathic pulmonary fibrosis)          |                             |                                  |
| hydrogen peroxide                                   | COPD (Chronic obstructive pulmonary disease) |                             |                                  |
| hydroxyl radical                                    |                                              |                             |                                  |
| peroxynitrite                                       |                                              |                             |                                  |
| aldehydes                                           |                                              |                             |                                  |
